# Supplementary material for: A Genome-Wide Association Analysis Identified a Novel Susceptible Locus for Pathological Myopia at 11q24.1
Source: PLoS Genet. 2009 Sep 25;5(9):e1000660. doi: 10.1371/journal.pgen.1000660 (PMC2735651; doi:10.1371/journal.pgen.1000660)
Supplement: Table S1 — Summary results for the 29 SNPs significant at the P<10−4 level after population stratification adjustment in the first stage of the genome-wide association analysis. (0.06 MB XLS) [file pgen.1000660.s001.xls]

## Sheet: Supple
	Table S1. Summary results for the 29 SNPs significant at the P < 10-4 level after population stratification adjustment in the first stage of the genome-wide association analysis
	SNP ID	Chr.	Positiona	Ref.a	Vara	Gene	Location	First stage (N=1,231)						Second stage (N=1,510)				Meta-analysis
								Ref. allele frequency		P-valueb		Ref. allelic OR (95%CI)		Ref. allele frequency		Nominal P-valueb		P-value	Ref. allelic OR (95%CI)
								Case (N=297)	Control (N=934)	Nominal	Adjusted			Case (N=533)	Control (N=977)
	rs12187403	5q23.1	117124705	A	G	DTWD2	flanking	0.93	0.97	3.25×10-6	6.68×10-6	0.37 (0.24-0.57)		0.96	0.97	0.5		7.78×10-4	0.61 (0.45-0.81)
	rs6938674	6p21.33	31515983	T	C	HCP5	flanking	0.92	0.85	5.53×10-6	1.10×10-5	2.11 (1.52-2.93)		0.9	0.89	0.5		4.23×10-4	1.43 (1.17-1.74)
	rs886929	17q23.2	53155642	G	A	MSI2	flanking	0.71	0.8	6.08×10-6	1.20×10-5	0.61 (0.50-0.75)		0.76	0.78	0.17		8.69×10-5	0.76 (0.67-0.87)
	rs6595070	5q23.1	117277045	G	T	DTWD2	flanking	0.95	0.98	6.61×10-6	1.30×10-5	0.33 (0.20-0.54)		0.97	0.98	0.53		1.02×10-3	0.56 (0.40-0.79)
	rs7517829	1p36.12	22352746	A	G	WNT4	flanking	0.35	0.46	9.19×10-6	1.77×10-5	0.64 (0.53-0.78)		0.41	0.42	0.52		7.61×10-4	0.81 (0.72-0.92)
	rs7839962	8p12	34579656	C	T	UNC5D	flanking	0.59	0.69	1.51×10-5	2.83×10-5	0.66 (0.54-0.80)		0.65	0.65	0.71		3.20×10-3	0.83 (0.74-0.94)
	rs10103839c	8p12	34982744	T	G	UNC5D	flanking	0.44	0.54	1.57×10-5	2.93×10-5	0.67 (0.56-0.81)		-	-	-		-	-
	rs2517082	8p22	17080632	T	C	ZDHHC2	intron	0.16	0.24	1.61×10-5	3.00×10-5	0.58 (0.45-0.74)		0.21	0.23	0.2		2.11×10-4	0.76 (0.66-0.88)
	rs2395095d	10q22.2	76116311	T	G	ADK	intron	0.4	0.3	1.70×10-5	3.17×10-5	1.52 (1.25-1.84)		0.33	0.31	0.34		6.72×10-4	1.24 (1.10-1.40)
	rs10503971c	8p12	34986048	T	C	UNC5D	flanking	0.44	0.54	1.72×10-5	3.19×10-5	0.67 (0.56-0.81)		0.5	0.53	0.16		2.25×10-4	0.80 (0.71-0.90)
	rs12548215c	8p12	34994554	A	G	UNC5D	flanking	0.44	0.54	1.88×10-5	3.48×10-5	0.68 (0.56-0.81)		-	-	-		-	-
	rs10090404c	8p12	34991698	T	C	UNC5D	flanking	0.44	0.54	2.06×10-5	3.79×10-5	0.68 (0.56-0.81)		-	-	-		-	-
	rs2010725	5q34	160617498	T	G	GABRB2	flanking	0.91	0.95	2.17×10-5	3.97×10-5	0.48 (0.34-0.68)		0.94	0.94	0.53		0.04	0.78 (0.61-0.98)
	rs946185d	10q22.2	76093745	A	G	ADK	intron	0.4	0.3	2.25×10-5	4.12×10-5	1.51 (1.25-1.83)		-	-	-		-	-
	rs12186237	4p16.2	4825303	G	A	MSX1	flanking	0.98	0.93	2.28×10-5	4.16×10-5	3.32 (1.86-5.91)		0.95	0.94	0.16		2.10×10-4	1.72 (1.29-2.29)
	rs12541698c	8p12	34923482	C	T	UNC5D	flanking	0.45	0.55	2.39×10-5	4.35×10-5	0.68 (0.56-0.82)		-	-	-		-	-
	rs4324915c	8p12	34938716	G	A	UNC5D	flanking	0.45	0.55	2.39×10-5	4.35×10-5	0.68 (0.56-0.82)		-	-	-		-	-
	rs4626473	7q11.22	68525154	G	T	AUTS2	flanking	0.58	0.67	2.78×10-5	5.02×10-5	0.67 (0.55-0.81)		0.64	0.65	0.7		4.00×10-3	0.84 (0.74-0.94)
	rs577948	11q24.1	121535400	A	G	BLID	flanking	0.4	0.5	2.80×10-5	5.05×10-5	0.67 (0.55-0.80)		0.42	0.48	1.42×10-3		2.22×10-7	0.73 (0.65-0.82)
	rs4654110	1q44	244643284	A	G	SMYD3	intron	0.86	0.79	3.14×10-5	5.62×10-5	1.70 (1.31-2.21)		0.83	0.8	0.08		1.07×10-4	1.36 (1.17-1.60)
	rs9266629	6p21.33	31454801	T	C	HLA-B	flanking	0.87	0.79	3.15×10-5	5.65×10-5	1.73 (1.34-2.25)		0.82	0.84	0.29		0.06	1.17 (0.99-1.37)
	rs1432496	7p21.2	13474148	G	A	ETV1	flanking	0.84	0.9	3.58×10-5	6.37×10-5	0.59 (0.45-0.76)		0.89	0.88	0.24		0.11	0.86 (0.72-1.03)
	rs917857	12p13.31	5952085	G	A	VWF	intron	0.81	0.88	3.68×10-5	6.53×10-5	0.60 (0.47-0.77)		0.86	0.86	0.83		7.43×10-3	0.80 (0.68-0.94)
	rs17094058	14q23.1	57509294	T	C	C14orf37	flanking	0.5	0.6	3.93×10-5	6.95×10-5	0.68 (0.57-0.82)		0.56	0.56	0.98		0.01	0.86 (0.76-0.97)
	rs4520153c	8p12	35002235	A	C	UNC5D	flanking	0.45	0.55	4.13×10-5	7.27×10-5	0.69 (0.57-0.83)		-	-	-		-	-
	rs1497921	4q13.1	62208876	G	T	LPHN3	intron	0.8	0.87	4.29×10-5	7.55×10-5	0.60 (0.48-0.77)		0.86	0.85	0.43		0.05	0.85 (0.72-1.00)
	rs3923324	10q26.13	124987109	C	T	BUB3	flanking	0.3	0.22	4.77×10-5	8.34×10-5	1.52 (1.24-1.87)		0.22	0.23	0.27		0.09	1.13 (0.98-1.29)
	rs3812852	13q22.1	72529874	A	G	KLF5	flanking	0.81	0.88	5.39×10-5	9.35×10-5	0.60 (0.47-0.77)		0.86	0.85	0.78		0.03	0.83 (0.70-0.98)
	rs11851080	14q23.1	57480076	G	A	C14orf37	flanking	0.76	0.68	5.71×10-5	9.86×10-5	1.54 (1.25-1.90)		0.67	0.7	0.08		0.29	1.07 (0.94-1.22)
	a The position of each SNP and reference and variant alleles were defined on the forward strand of the NCBI Build 36.1.
	b The P-values were calculated using a χ2 test for trend. The adjusted P-values for population stratification by the genomic control method were also shown for the first stage.
	Seven SNPs on chromosome 8p12 (c) were in strong linkage disequilibrium, likewise two SNPs on chromosome 10q22.2 (d) (pairwise D’ > 0.95 and r2 > 0.9).
